# Supplementary material for: Structure of small yttrium monoxide clusters, chemical bonding, and photoionization: threshold photoionization and density functional theory investigations
Source: Royal Society of Chemistry journal article supplement (doi:10.1039/d4cp02351j), 2024-01-01
Supplement: d4cp02351j1.pdf [file d4cp02351j1.pdf]

## Supporting Information

### Structure of Small Yttrium Monoxide Clusters, Chemical Bonding, and Photoionization: Threshold Photoionization and Density Functional Theory Investigations

Varun Vinayak Deshpande,<sup>a,b</sup> Vaibhav Chauhan,<sup>a</sup> Debashis Bandyopadhyay,<sup>c</sup> Anakuthil Anoop,<sup>d</sup> and Soumen Bhattacharyya<sup>\*a,b</sup>

<sup>a</sup>Atomic & Molecular Physics Division, Bhabha Atomic Research Centre, Mumbai 400 085, India.

<sup>b</sup>Homi Bhabha National Institute, Anushaktinagar, Mumbai 400 094, India.

<sup>c</sup>Physics Department, Birla Institute of Technology and Science, Pilani 333031, Rajasthan, India.

<sup>d</sup>School of Digital Sciences, Kerala University of Digital Science, Innovation, and Technology, Digital University Kerala, Technopark Phase IV, Pallipuram, Thiruvananthapuram, Kerala – 695317

\* Corresponding author's Email: sbhatt@barc.gov.in

This Supporting Information contains the following:

**Table S1.** Cartesian coordinates (x, y, z) of the ground state structures of the  $Y_nO$  ( $n = 1-8$ ) clusters.

**Table S2.** Vibrational frequencies of the neutral and cation clusters of  $Y_nO$  ( $n=1-8$ ).

**Table S3.** Natural Bond Order (NBO) populations and partial charges on atoms on the ground state structures of the neutral  $Y_nO$  ( $n = 2-8$ ) clusters.

**Fig. S1.** Mass spectrum of the neutral  $Y_nO_m$  clusters (a) with unseeded oxygen, and (b) with 1% oxygen seeding in helium gas.

**Figs. S2 to S7:** Photoionization spectra (simulated and experimental) of YO, Y<sub>2</sub>O, Y<sub>5</sub>O, Y<sub>6-8</sub>O, respectively.

**Fig. S8.** The trend of experimentally corrected AIEs and HOMO–LUMO energy gaps with cluster size.

**Fig. S9.** Molecular orbitals (MOs) of Y<sub>2</sub>O.

**Fig. S10.** Molecular orbitals (MOs) of Y<sub>3</sub>O.

**Fig. S11.** Average change in population of s and d atomic orbitals.

**Fig. S12.** Benchmarking of our NBO analysis. The charges reported by Misao et al. in *Phys. Chem. Chem. Phys.*, 2022, **24**, 11096–11103. The charges in parenthesis are our calculated values.

**Fig. S13.** HOMO orbitals of  $Y_nO$  ( $n = 2 - 8$ ) clusters.

**Fig. S14.** The calculated total density of states (DOS) around the HOMO of the Y<sub>3</sub>O (3b) cluster along with the experimental photoionization spectrum.

**Fig. S15.** The total density of states (DOS) and projected DOS of the ground state structures of Y<sub>3</sub>O, Y<sub>5</sub>O, and Y<sub>6</sub>O clusters.

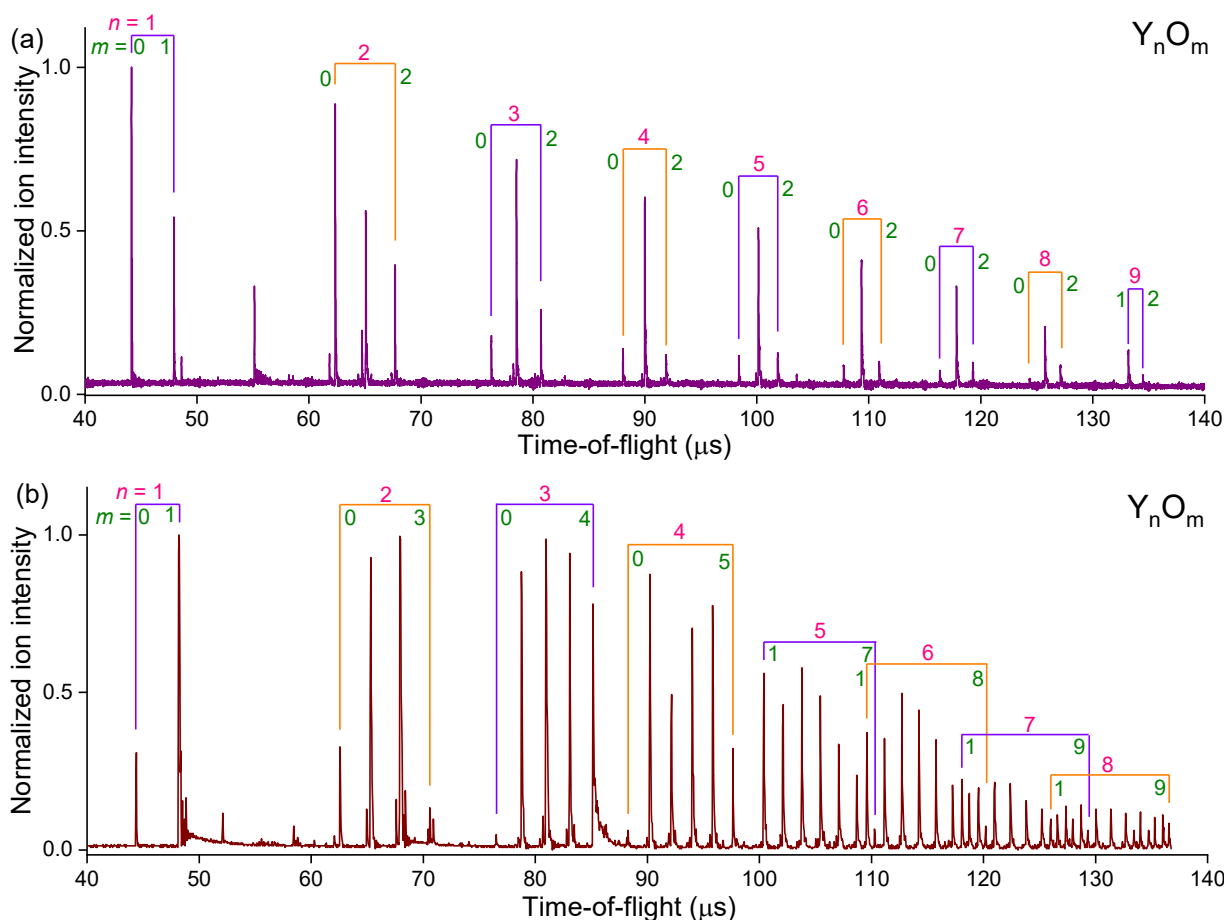

**Fig. S1.** Mass spectrum of the neutral  $\text{Y}_n\text{O}_m$  clusters (a) with unseeded oxygen, and (b) with 1% oxygen seeding in helium gas.

**Table S1.** Cartesian coordinates ( $x, y, z$ ) of the ground state structures of the  $\text{Y}_n\text{O}$  ( $n = 1-8$ ) clusters.

| Neutral               |               |              |               | Cation |               |              |               |
|-----------------------|---------------|--------------|---------------|--------|---------------|--------------|---------------|
| <b>YO</b>             |               |              |               |        |               |              |               |
|                       |               |              |               |        |               |              |               |
| Atom                  | x             | y            | z             | Atom   | x             | y            | z             |
| Y                     | 0.0355911764  | 0.0002935317 | -2.3417444650 | Y      | 0.0213397950  | 0.0009846174 | -2.3237853634 |
| O                     | -1.0994780016 | 0.0165581364 | -0.9120719108 | O      | -1.0852215232 | 0.0156953247 | -0.9300311415 |
| <b>Y<sub>2</sub>O</b> |               |              |               |        |               |              |               |
|                       |               |              |               |        |               |              |               |
| Y                     | -0.001060000  | 0.001110000  | 2.003359999   | Y      | -1.986169999  | -0.000180000 | 0.000000000   |
| Y                     | 0.001060000   | -0.001570000 | -2.003359999  | Y      | 1.986169999   | -0.000250000 | 0.000000000   |
| O                     | 0.000000000   | 0.002230000  | 0.000000000   | O      | 0.000000000   | 0.002080000  | 0.000000000   |
| <b>Y<sub>3</sub>O</b> |               |              |               |        |               |              |               |
|                       |               |              |               |        |               |              |               |
| Y                     | 1.839838411   | 0.512469781  | -0.057100905  | y      | 1.859374366   | 0.505910530  | -0.045098814  |
| Y                     | -1.346941193  | 1.344702363  | -0.069143439  | Y      | -1.360921842  | 1.358824248  | -0.049091372  |
| Y                     | -0.507887166  | -1.839599866 | -0.054814725  | Y      | -0.501198259  | -1.859230265 | -0.042765742  |
| O                     | 0.016207017   | -0.013834818 | 0.941704908   | O      | 0.003962805   | -0.001767053 | 0.897601767   |

|   |              | Y <sub>4</sub> O                                                                  |              |   |                                                                                    |              |              |
|---|--------------|-----------------------------------------------------------------------------------|--------------|---|------------------------------------------------------------------------------------|--------------|--------------|
|   |              | 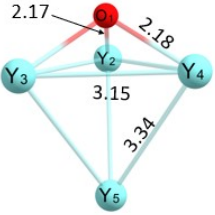 |              |   |  |              |              |
| Y | -1.074717650 | -1.596245960                                                                      | 0.000000000  | Y | 1.426657466                                                                        | 0.081843332  | 1.606401137  |
| Y | 1.090087960  | 0.069266730                                                                       | -1.573995530 | Y | -1.190626103                                                                       | 1.678663333  | -0.081721457 |
| Y | 1.090087960  | 0.069266730                                                                       | 1.573995530  | Y | -1.190309339                                                                       | -1.678887154 | 0.081640572  |
| Y | -1.329066050 | 1.751914210                                                                       | 0.000000000  | Y | 1.426627641                                                                        | -0.081601683 | -1.606557557 |
| O | 1.090087960  | -1.434233270                                                                      | 0.000000000  | O | -2.300614835                                                                       | -0.000222327 | -0.000206275 |

|   |              | Y <sub>5</sub> O                                                                  |              |   |                                                                                    |              |              |
|---|--------------|-----------------------------------------------------------------------------------|--------------|---|------------------------------------------------------------------------------------|--------------|--------------|
|   |              | 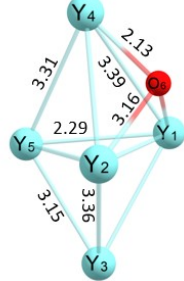 |              |   |  |              |              |
| Y | 0.011170230  | 0.944830960                                                                       | 1.681114220  | Y | 0.035059774                                                                        | 0.932379252  | 1.682529901  |
| Y | 0.011525870  | 0.943822150                                                                       | -1.681407240 | Y | 0.035338401                                                                        | 0.931568020  | -1.682882399 |
| Y | -2.743789760 | 0.008975140                                                                       | -0.000389770 | Y | -2.734530199                                                                       | 0.016022024  | -0.000275872 |
| Y | 2.678309020  | -0.291748760                                                                      | -0.000117040 | Y | 2.671473304                                                                        | -0.240350813 | 0.000151666  |
| Y | -0.225785830 | -1.880787410                                                                      | 0.000782970  | Y | -0.292794807                                                                       | -1.961104244 | 0.000725749  |
| O | 1.309281070  | 1.340176110                                                                       | 0.000082150  | O | 1.326164128                                                                        | 1.386753950  | -0.000183756 |

|   |              | Y <sub>6</sub> O                                                                    |              |   |                                                                                      |              |              |
|---|--------------|-------------------------------------------------------------------------------------|--------------|---|--------------------------------------------------------------------------------------|--------------|--------------|
|   |              | 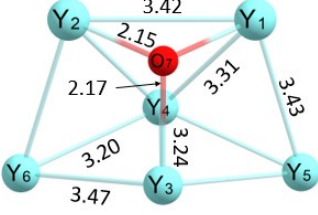 |              |   |  |              |              |
| y | 0.116436040  | 1.823983550                                                                         | 1.671753370  | Y | 0.088932515                                                                          | 1.829045982  | 1.675697305  |
| Y | 0.116436040  | 1.823983550                                                                         | -1.671753370 | y | 0.088939606                                                                          | 1.829051398  | -1.675691499 |
| Y | -1.713061630 | -0.491924900                                                                        | 0.000000000  | Y | -1.741366369                                                                         | -0.412786295 | -0.000000260 |
| Y | 1.499362490  | -0.675914310                                                                        | 0.000000000  | Y | 1.634778201                                                                          | -0.593001975 | -0.000004887 |
| Y | 0.116436040  | -1.406027690                                                                        | 2.779048790  | Y | 0.100133996                                                                          | -1.542320570 | 2.620594060  |
| Y | 0.116436040  | -1.406027690                                                                        | -2.779048790 | Y | 0.100131322                                                                          | -1.542327797 | -2.620593499 |
| O | -1.228719390 | 1.618146450                                                                         | 0.000000000  | O | -1.248223641                                                                         | 1.718558217  | -0.000001219 |

|   |              | Y <sub>7</sub> O                                                                    |              |   |                                                                                      |             |              |
|---|--------------|-------------------------------------------------------------------------------------|--------------|---|--------------------------------------------------------------------------------------|-------------|--------------|
|   |              | 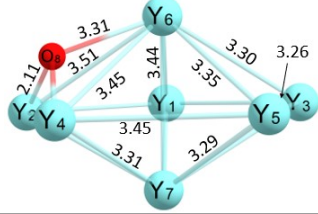 |              |   |  |             |              |
| Y | 0.732421400  | 2.847996490                                                                         | 0.028372610  | Y | 0.653552742                                                                          | 2.898221881 | 0.051156498  |
| Y | 2.913699680  | 0.228229690                                                                         | 0.097192230  | Y | 2.922260993                                                                          | 0.162999379 | 0.091830182  |
| Y | -2.443655220 | 1.562859670                                                                         | -0.005549160 | Y | -2.366248657                                                                         | 1.565314269 | -0.009888607 |

|                  |              |              |              |   |              |              |              |
|------------------|--------------|--------------|--------------|---|--------------|--------------|--------------|
| Y                | 0.922895110  | -2.759852360 | 0.107173940  | Y | 0.987549568  | -2.764775992 | 0.160237896  |
| Y                | -2.363018320 | -1.695027600 | 0.076803060  | Y | -2.416442935 | -1.712925498 | 0.097733952  |
| Y                | -0.084816380 | -0.010887490 | -1.710429280 | Y | -0.062542684 | 0.050165118  | -1.736595229 |
| Y                | -0.025881770 | 0.056116670  | 1.605741490  | Y | -0.035155518 | 0.050788128  | 1.567017185  |
| O                | 1.698233060  | -1.118496000 | -0.971611330 | O | 1.666904051  | -1.138848215 | -0.993798317 |
| Y <sub>8</sub> O |              |              |              |   |              |              |              |
|                  |              |              |              |   |              |              |              |
| Y                | -2.979839650 | -1.547115220 | -0.001013890 | Y | -1.369055391 | -2.594251815 | 1.600070129  |
| Y                | -0.822161980 | 0.085636840  | 1.932687040  | Y | -1.294902226 | -2.428079749 | -1.698410286 |
| Y                | 0.544092410  | -2.124319450 | -0.001717830 | Y | 0.253288781  | 0.480443354  | 2.339356058  |
| Y                | 2.746531430  | -0.232246280 | 1.652566880  | Y | 0.526681234  | 1.021644051  | -2.053125254 |
| Y                | -0.822027360 | 0.088330300  | -1.932343100 | Y | 1.338132755  | -1.466940187 | -0.012516619 |
| Y                | -2.924332580 | 1.598554440  | 0.001042970  | Y | -1.974057807 | 0.281448881  | -0.000523753 |
| Y                | 2.746097150  | -0.228883310 | -1.653097100 | Y | 2.767468435  | 1.654723770  | 0.377233714  |
| Y                | 0.921374690  | 2.127283540  | 0.001610700  | Y | -0.199924634 | 3.219190321  | 0.364545005  |
| O                | 2.877546220  | 1.134700870  | 0.001288660  | O | 1.428881375  | 2.698817105  | -0.916628994 |

**Table S2.** Vibrational frequencies of neutral and cation clusters of Y<sub>n</sub>O (n=1-8). <sup>a</sup> δ<sub>s</sub>: symmetric bend; π: out-of-plane bend; ν<sub>s</sub>: symmetric stretch; ν<sub>a</sub>: asymmetric stretch.

| Mode <sup>a</sup>                | Y <sub>2</sub> O |                       | Y <sub>2</sub> O <sup>+</sup> |                               |  |
|----------------------------------|------------------|-----------------------|-------------------------------|-------------------------------|--|
|                                  | Symmetry         | ω (cm <sup>-1</sup> ) | Symmetry                      | ω (cm <sup>-1</sup> )         |  |
| ν <sub>1</sub> (δ <sub>s</sub> ) | a                | 92.443                | a                             | 41.365                        |  |
| ν <sub>2</sub> (π)               | a                | 92.460                | a                             | 41.446                        |  |
| ν <sub>3</sub> (ν <sub>s</sub> ) | a                | 265.547               | a                             | 271.652                       |  |
| ν <sub>4</sub> (ν <sub>a</sub> ) | a                | 838.257               | a                             | 703.145                       |  |
|                                  |                  | Y <sub>3</sub> O      |                               | Y <sub>3</sub> O <sup>+</sup> |  |
| ν <sub>1</sub>                   | a                | 138.402               | a                             | 129.128                       |  |
| ν <sub>2</sub>                   | a                | 147.520               | a                             | 141.037                       |  |
| ν <sub>3</sub>                   | a                | 162.098               | a                             | 164.284                       |  |
| ν <sub>4</sub>                   | a                | 336.773               | a                             | 381.859                       |  |
| ν <sub>5</sub>                   | a                | 386.867               | a                             | 399.657                       |  |
| ν <sub>6</sub>                   | a                | 457.737               | a                             | 441.234                       |  |
|                                  |                  | Y <sub>4</sub> O      |                               | Y <sub>4</sub> O <sup>+</sup> |  |
| ν <sub>1</sub>                   | a                | 70.09                 | a                             | 30.43                         |  |
| ν <sub>2</sub>                   | a                | 73.07                 | a                             | 60.59                         |  |
| ν <sub>3</sub>                   | a                | 140.62                | a                             | 129.85                        |  |
| ν <sub>4</sub>                   | a                | 143.88                | a                             | 148.67                        |  |
| ν <sub>5</sub>                   | a                | 149.14                | a                             | 151.28                        |  |
| ν <sub>6</sub>                   | a                | 201.43                | a                             | 195.16                        |  |
| ν <sub>7</sub>                   | a                | 317.73                | a                             | 366.12                        |  |
| ν <sub>8</sub>                   | a                | 349.11                | a                             | 379.05                        |  |
| ν <sub>9</sub>                   | a                | 488.24                | a                             | 511.24                        |  |
|                                  |                  | Y <sub>5</sub> O      |                               | Y <sub>5</sub> O <sup>+</sup> |  |
| ν <sub>1</sub>                   | a                | 62.33                 | a                             | 77.23                         |  |
| ν <sub>2</sub>                   | a                | 73.62                 | a                             | 82.54                         |  |
| ν <sub>3</sub>                   | a                | 95.41                 | a                             | 97.08                         |  |
| ν <sub>4</sub>                   | a                | 100.12                | a                             | 104.47                        |  |
| ν <sub>5</sub>                   | a                | 116.73                | a                             | 115.95                        |  |
| ν <sub>6</sub>                   | a                | 131.50                | a                             | 128.09                        |  |

|                 |   |                  |   |                               |
|-----------------|---|------------------|---|-------------------------------|
| V <sub>7</sub>  | a | 139.90           | a | 143.96                        |
| V <sub>8</sub>  | a | 143.46           | a | 157.13                        |
| V <sub>9</sub>  | a | 169.81           | a | 169.80                        |
| V <sub>10</sub> | a | 362.92           | a | 361.50                        |
| V <sub>11</sub> | a | 369.33           | a | 368.01                        |
| V <sub>12</sub> | a | 443.55           | a | 454.10                        |
|                 |   | Y <sub>6</sub> O |   | Y <sub>6</sub> O <sup>+</sup> |
| V <sub>1</sub>  | a | 40.96            | a | 28.79                         |
| V <sub>2</sub>  | a | 67.74            | a | 63.18                         |
| V <sub>3</sub>  | a | 78.96            | a | 87.32                         |
| V <sub>4</sub>  | a | 96.654           | a | 92.40                         |
| V <sub>5</sub>  | a | 98.061           | a | 101.49                        |
| V <sub>6</sub>  | a | 110.284          | a | 105.81                        |
| V <sub>7</sub>  | a | 121.353          | a | 109.24                        |
| V <sub>8</sub>  | a | 123.588          | a | 111.82                        |
| V <sub>9</sub>  | a | 127.135          | a | 136.23                        |
| V <sub>10</sub> | a | 154.105          | a | 146.90                        |
| V <sub>11</sub> | a | 160.215          | a | 156.37                        |
| V <sub>12</sub> | a | 179.936          | a | 181.43                        |
| V <sub>13</sub> | a | 371.265          | a | 386.77                        |
| V <sub>14</sub> | a | 422.849          | a | 422.70                        |
| V <sub>15</sub> | a | 426.435          | a | 423.97                        |
|                 |   | Y <sub>7</sub> O |   | Y <sub>7</sub> O <sup>+</sup> |
| V <sub>1</sub>  | a | 44.32            | a | 58.32                         |
| V <sub>2</sub>  | a | 56.65            | a | 72.60                         |
| V <sub>3</sub>  | a | 64.73            | a | 73.36                         |
| V <sub>4</sub>  | a | 74.85            | a | 85.09                         |
| V <sub>5</sub>  | a | 90.74            | a | 91.96                         |
| V <sub>6</sub>  | a | 92.22            | a | 99.77                         |
| V <sub>7</sub>  | a | 105.23           | a | 102.63                        |
| V <sub>8</sub>  | a | 108.94           | a | 114.78                        |
| V <sub>9</sub>  | a | 118.98           | a | 123.77                        |
| V <sub>10</sub> | a | 129.84           | a | 133.94                        |
| V <sub>11</sub> | a | 133.29           | a | 135.52                        |
| V <sub>12</sub> | a | 147.43           | a | 146.00                        |
| V <sub>13</sub> | a | 161.23           | a | 157.76                        |
| V <sub>14</sub> | a | 166.98           | a | 174.33                        |
| V <sub>15</sub> | a | 202.85           | a | 201.59                        |
| V <sub>16</sub> | a | 405.45           | a | 381.79                        |
| V <sub>17</sub> | a | 484.45           | a | 453.54                        |
| V <sub>18</sub> | a | 498.10           | a | 501.48                        |
|                 |   | Y <sub>8</sub> O |   | Y <sub>8</sub> O <sup>+</sup> |
| V <sub>1</sub>  | a | 51.77            | a | 52.43                         |
| V <sub>2</sub>  | a | 52.81            | a | 60.62                         |
| V <sub>3</sub>  | a | 62.44            | a | 64.91                         |
| V <sub>4</sub>  | a | 73.12            | a | 71.42                         |
| V <sub>5</sub>  | a | 74.13            | a | 76.32                         |
| V <sub>6</sub>  | a | 94.87            | a | 94.02                         |
| V <sub>7</sub>  | a | 99.75            | a | 99.15                         |
| V <sub>8</sub>  | a | 102.51           | a | 102.18                        |
| V <sub>9</sub>  | a | 105.45           | a | 107.88                        |
| V <sub>10</sub> | a | 118.63           | a | 118.39                        |
| V <sub>11</sub> | a | 121.73           | a | 122.87                        |
| V <sub>12</sub> | a | 124.53           | a | 129.85                        |
| V <sub>13</sub> | a | 130.02           | a | 131.23                        |
| V <sub>14</sub> | a | 140.08           | a | 137.51                        |
| V <sub>15</sub> | a | 143.58           | a | 143.51                        |
| V <sub>16</sub> | a | 148.47           | a | 153.66                        |
| V <sub>17</sub> | a | 169.19           | a | 165.61                        |
| V <sub>18</sub> | a | 201.64           | a | 202.90                        |
| V <sub>19</sub> | a | 340.56           | a | 355.86                        |
| V <sub>20</sub> | a | 391.12           | a | 402.50                        |
| V <sub>21</sub> | a | 472.22           | a | 478.06                        |

**Table S3.** Natural Bond Order (NBO) populations and partial charges on atoms on the ground state structures of the neutral  $Y_nO$  ( $n = 3-8$ ) clusters. The atom numbering in the table corresponds to the numbering in Table S1. Population on each atom in the s, p, d atomic orbitals, total population, and partial electronic charge ( $\pm q$ ) on an atom are provided.

| Atom            | s    | p    | d    | Total | q              | s    | p    | d    | Total | q     |
|-----------------|------|------|------|-------|----------------|------|------|------|-------|-------|
| Neutral Cluster |      |      |      |       | Cation Cluster |      |      |      |       |       |
| $Y_3O$          |      |      |      |       | $Y_3O^+$       |      |      |      |       |       |
| Y 1             | 3.21 | 6.01 | 1.07 | 10.30 | 0.70           | 2.88 | 6.01 | 1.12 | 10.01 | +0.98 |
| Y 2             | 3.21 | 6.01 | 1.07 | 10.30 | 0.70           | 2.88 | 6.01 | 1.12 | 10.01 | +0.98 |
| Y 3             | 3.65 | 6.12 | 1.31 | 11.08 | -0.07          | 3.10 | 6.09 | 1.47 | 10.66 | +0.33 |
| O 3             | 3.91 | 5.42 | 0.00 | 9.32  | -1.33          | 3.91 | 5.40 | 0.00 | 9.31  | -1.31 |
| $Y_4O$          |      |      |      |       | $Y_4O^+$       |      |      |      |       |       |
| Y 1             | 3.14 | 6.02 | 1.37 | 10.53 | +0.47          | 2.96 | 6.02 | 1.33 | 10.31 | +0.68 |
| Y 2             | 3.14 | 6.02 | 1.34 | 10.50 | +0.50          | 2.96 | 6.02 | 1.31 | 10.29 | +0.71 |
| Y 3             | 3.14 | 6.02 | 1.37 | 10.53 | +0.47          | 2.96 | 6.02 | 1.33 | 10.31 | +0.68 |
| Y 4             | 3.63 | 6.08 | 1.34 | 11.05 | -0.05          | 3.20 | 6.09 | 1.39 | 10.68 | +0.32 |
| O 5             | 3.89 | 5.50 | 0.00 | 9.39  | -1.39          | 3.89 | 5.50 | 0.00 | 9.39  | -1.39 |
| $Y_5O$          |      |      |      |       | $Y_5O^+$       |      |      |      |       |       |
| Y 1             | 3.37 | 6.05 | 1.43 | 10.85 | +0.15          | 3.18 | 6.04 | 1.44 | 10.66 | +0.33 |
| Y 2             | 3.08 | 6.02 | 2.09 | 11.20 | -0.20          | 3.00 | 6.04 | 1.95 | 10.99 | +0.01 |
| Y 3             | 2.98 | 6.02 | 1.58 | 10.58 | +0.42          | 2.85 | 6.02 | 1.55 | 10.42 | +0.58 |
| Y 4             | 2.98 | 6.02 | 1.58 | 10.58 | +0.42          | 2.85 | 6.02 | 1.55 | 10.42 | +0.58 |
| Y 5             | 3.16 | 6.01 | 1.22 | 10.40 | +0.60          | 2.91 | 6.00 | 1.19 | 10.11 | +0.89 |
| O 6             | 3.88 | 5.51 | 0.00 | 9.39  | -1.39          | 3.88 | 5.51 | 0.00 | 9.39  | -1.39 |
| $Y_6O$          |      |      |      |       | $Y_6O^+$       |      |      |      |       |       |
| Y 1             | 2.85 | 6.04 | 1.60 | 10.48 | +0.51          | 2.77 | 6.04 | 1.43 | 10.24 | +0.76 |
| Y 2             | 2.85 | 6.04 | 1.61 | 10.51 | +0.49          | 2.74 | 6.03 | 1.60 | 10.38 | +0.62 |
| Y 3             | 2.85 | 6.04 | 1.61 | 10.51 | +0.49          | 2.74 | 6.03 | 1.60 | 10.38 | +0.62 |
| Y 4             | 3.07 | 6.05 | 1.92 | 11.04 | -0.04          | 2.99 | 6.05 | 1.81 | 10.86 | +0.14 |
| Y 5             | 3.07 | 6.05 | 1.92 | 11.04 | -0.04          | 2.99 | 6.05 | 1.81 | 10.86 | +0.14 |
| Y 6             | 3.06 | 6.05 | 1.93 | 11.04 | -0.04          | 2.93 | 6.04 | 1.92 | 10.90 | +0.10 |
| O 7             | 3.87 | 5.50 | 0.00 | 9.38  | -1.38          | 3.87 | 5.51 | 0.00 | 9.38  | -1.38 |
| $Y_7O$          |      |      |      |       | $Y_7O^+$       |      |      |      |       |       |
| Y 1             | 3.06 | 6.00 | 1.20 | 10.26 | +0.74          | 2.90 | 6.00 | 1.21 | 10.11 | +0.89 |
| Y 2             | 3.06 | 6.00 | 1.20 | 10.26 | +0.74          | 2.90 | 6.00 | 1.21 | 10.11 | +0.89 |
| Y 3             | 3.13 | 6.01 | 1.71 | 10.85 | +0.15          | 3.05 | 6.01 | 1.61 | 10.67 | +0.33 |
| Y 4             | 3.13 | 6.01 | 1.71 | 10.85 | +0.15          | 3.05 | 6.01 | 1.61 | 10.67 | +0.33 |
| Y 5             | 3.00 | 6.02 | 1.71 | 10.74 | +0.25          | 2.95 | 6.03 | 1.61 | 10.59 | +0.40 |
| Y 6             | 2.92 | 6.00 | 2.85 | 11.11 | -0.77          | 2.83 | 6.01 | 2.89 | 11.73 | -0.73 |
| Y 7             | 2.83 | 6.02 | 2.01 | 10.86 | +1.40          | 2.70 | 6.03 | 1.98 | 10.71 | +0.29 |
| O 8             | 3.87 | 5.52 | 0.00 | 9.39  | -1.39          | 3.87 | 5.52 | 0.00 | 9.39  | -1.39 |
| $Y_8O$          |      |      |      |       | $Y_8O^+$       |      |      |      |       |       |
| Y 1             | 3.17 | 6.03 | 1.49 | 10.69 | +0.31          | 3.06 | 6.03 | 1.47 | 10.56 | +0.44 |
| Y 2             | 3.13 | 6.03 | 1.55 | 10.72 | +0.28          | 3.04 | 6.04 | 1.50 | 10.58 | +0.41 |
| Y 3             | 2.94 | 6.00 | 2.29 | 11.24 | -0.24          | 2.90 | 6.01 | 2.38 | 11.29 | -0.29 |
| Y 4             | 2.83 | 6.00 | 1.63 | 10.47 | +0.52          | 2.78 | 6.00 | 1.64 | 10.42 | +0.58 |
| Y 5             | 2.97 | 6.01 | 2.53 | 11.51 | -0.51          | 2.91 | 6.01 | 2.37 | 11.29 | -0.29 |
| Y 6             | 2.97 | 6.01 | 2.54 | 11.52 | -0.52          | 2.90 | 6.01 | 2.41 | 11.32 | -0.33 |
| Y 7             | 2.97 | 6.01 | 1.24 | 10.22 | +0.78          | 2.86 | 6.01 | 1.18 | 10.05 | +0.95 |
| Y 8             | 2.97 | 6.01 | 1.24 | 10.22 | +0.78          | 2.85 | 6.01 | 1.20 | 10.07 | +0.93 |
| O 9             | 3.87 | 5.53 | 0.00 | 9.40  | -1.40          | 3.87 | 5.53 | 0.00 | 9.40  | -1.40 |

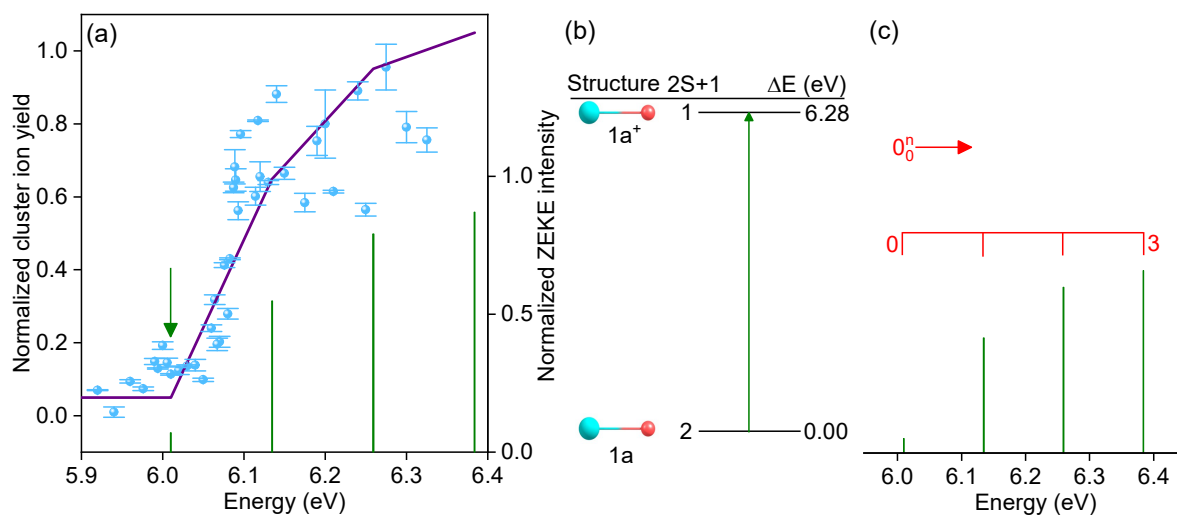

**Fig. S2.** (a) The simulated PI spectrum of YO (violet solid line) is overlaid against the experimental spectrum (blue spheres). The calculated ZEKE spectrum for the  $2 \rightarrow 1$  ionization process of 1a is shown below the PI spectrum in green. The AIE is labelled with a solid green arrow. (b) DFT calculated the lowest-energy geometric structures and energy levels of the neutral and cation clusters of YO. (c) Simulated ZEKE spectrum for the YO  $2 \rightarrow 1$  ionization transition. Prominent vibronic transitions are assigned in the graph.

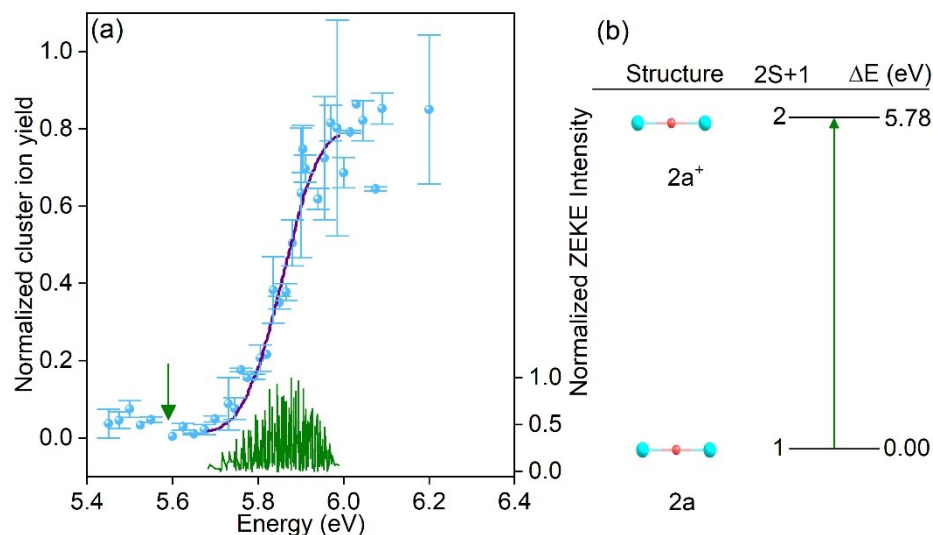

**Fig. S3.** (a) The simulated PI spectra of  $Y_2O$  (violet and red solid lines) is overlaid against the experimental spectrum (blue spheres). The calculated ZEKE spectrum for the  $1 \rightarrow 2$  ionization process for the 2a isomer is shown below the PI spectrum in green. The AIE is labelled with a solid green arrow. (b) DFT calculated the lowest-energy geometric structures and energy levels of the neutral and cation clusters of  $Y_2O$ . The peaks in the ZEKE spectrum is dominated by combination bands originating from the two lowest vibrational modes of the neutral.

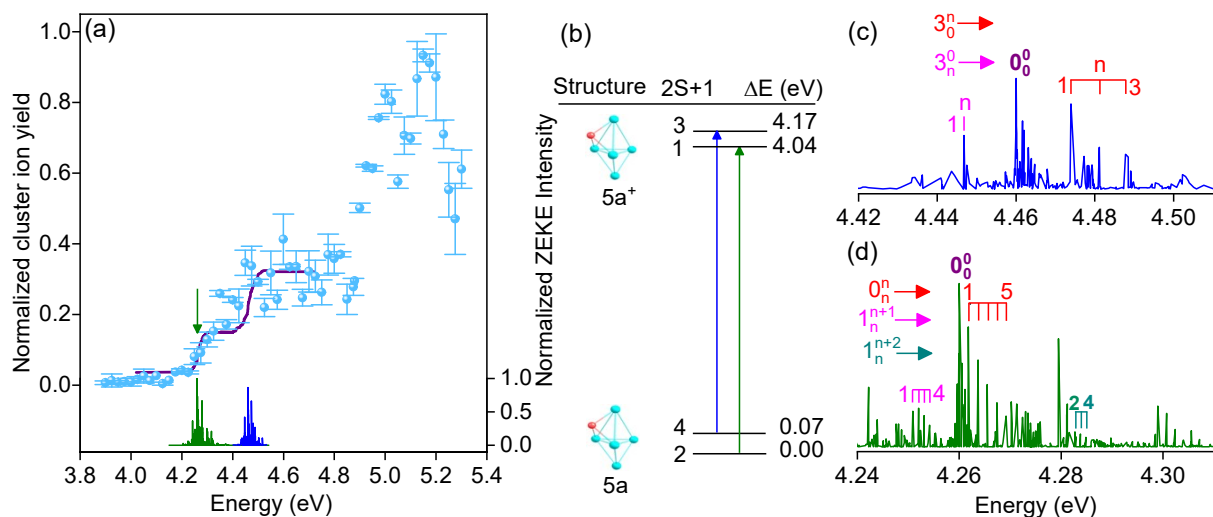

**Fig. S4.** (a) The simulated PI spectrum of  $Y_5O$  (violet solid line) is overlaid against the experimental spectrum (blue spheres). The calculated ZEKE spectra for the  $2 \rightarrow 1$  and  $4 \rightarrow 3$  ionization processes are shown below the PI spectrum in green and blue, respectively. The AIE is labelled with a solid green arrow. (b) DFT calculated the lowest-energy geometric structures and energy levels of the neutral and cation clusters of  $Y_5O$ . The simulated ZEKE spectra for  $Y_5O$  (c)  $5a$   $4 \rightarrow 3$  and (d)  $5a$   $2 \rightarrow 1$  ionization transition. Prominent vibronic transitions are assigned in the graph.

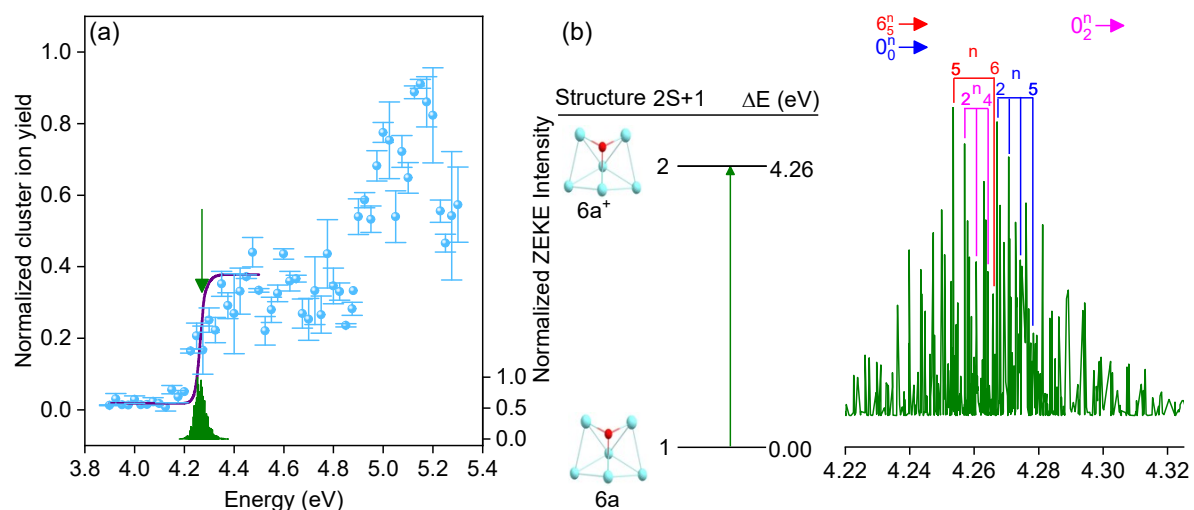

**Fig. S5.** (a) The simulated PI spectrum of  $Y_6O$  (violet solid line) is overlaid against the experimental spectrum (blue spheres). The calculated ZEKE spectrum for the  $1 \rightarrow 2$  ionization process is shown below the PI spectrum in green. The AIE is labelled with a solid green arrow. (b) DFT calculated the lowest-energy geometric structures and energy levels of the neutral and cation clusters of  $Y_6O$ , and (c) The simulated ZEKE spectrum for the  $Y_6O$   $6a$   $1 \rightarrow 2$  ionization transition. Prominent vibronic transitions are assigned in the graph.



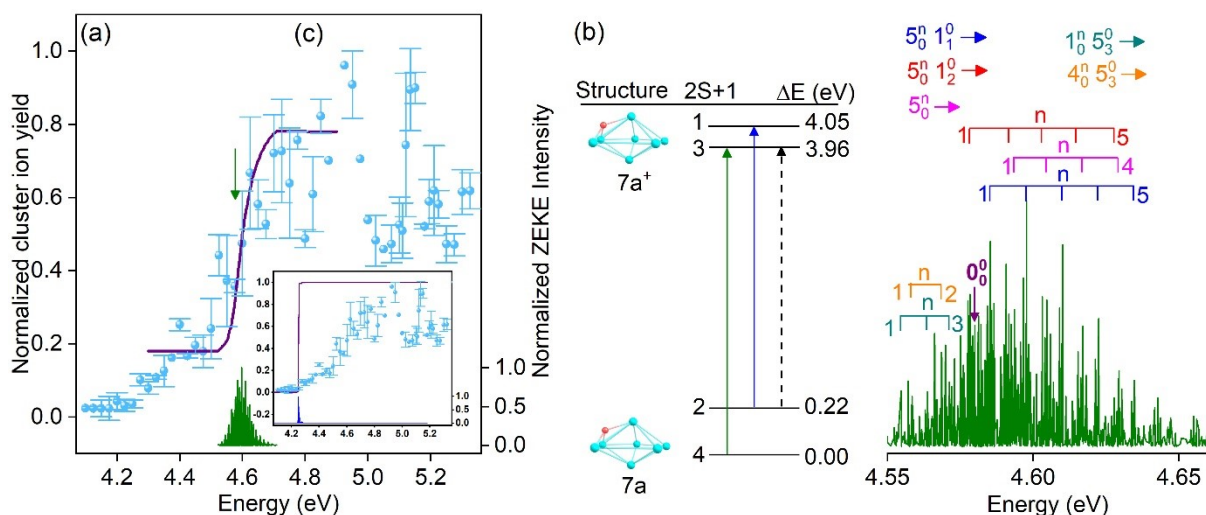

**Fig. S6.** (a) The simulated PI spectrum of  $Y_7O$  (violet solid line) is overlaid against the experimental spectrum (blue spheres). The calculated ZEKE spectrum for the  $4 \rightarrow 3$  ionization process is shown below the PI spectrum in green. The AIE is labelled with a solid green arrow. In the inset, the simulated PI spectrum corresponding to the  $2 \rightarrow 1$  transition is overlaid against the experimental spectrum, and corresponding ZEKE spectrum is shown below the PI spectrum in blue. The steeply sloped calculated PI spectrum does not correlate with the experimental PI spectrum. (b) DFT calculated the lowest-energy geometric structures and energy levels of the neutral and cation clusters of  $Y_7O$ , and (c) The simulated ZEKE spectrum for the  $Y_7O$ ,  $7a$   $4 \rightarrow 3$  ionization transition. Prominent vibronic transitions are assigned in the graph.

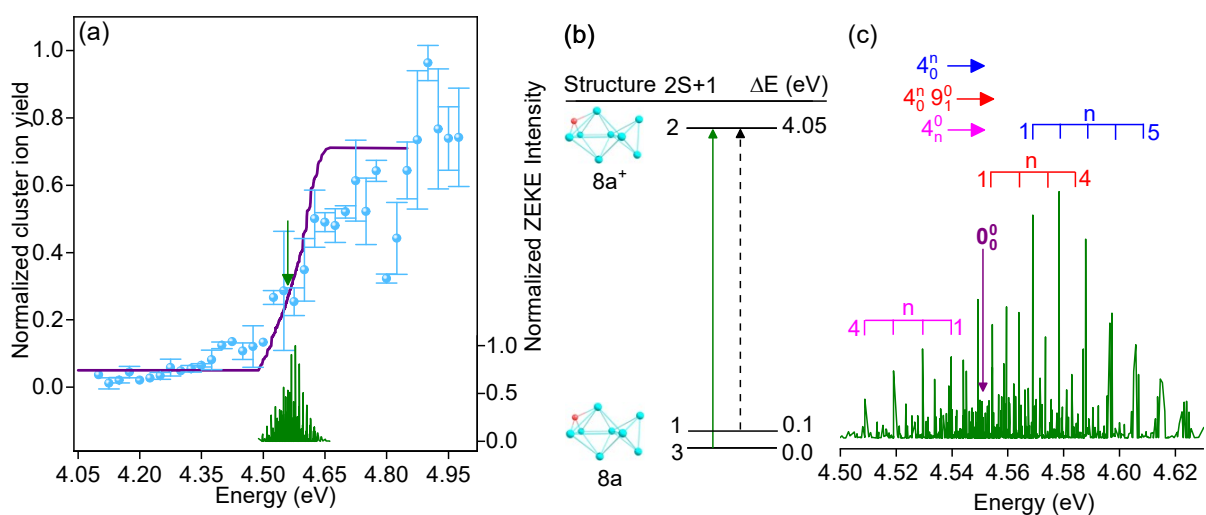

**Fig. S7.** (a) The simulated PI spectrum of  $Y_8O$  (violet solid line) is overlaid against the experimental spectrum (blue spheres). The calculated ZEKE spectrum for the  $3 \rightarrow 2$  ionization process is shown below the PI spectrum in green. The AIE is labelled with a solid green arrow. (b) DFT calculated the lowest-energy geometric structures and energy levels of the neutral and cation clusters of  $Y_8O$ . The intensity of the  $1 \rightarrow 2$  transition is stronger than the  $3 \rightarrow 2$  transition. However, the  $1 \rightarrow 2$  transition does not fit well with the experimental PI spectrum. (c) Simulated ZEKE spectrum of the  $8a$   $3 \rightarrow 2$  ionization transition of  $Y_8O$ . Prominent vibronic transitions are assigned.

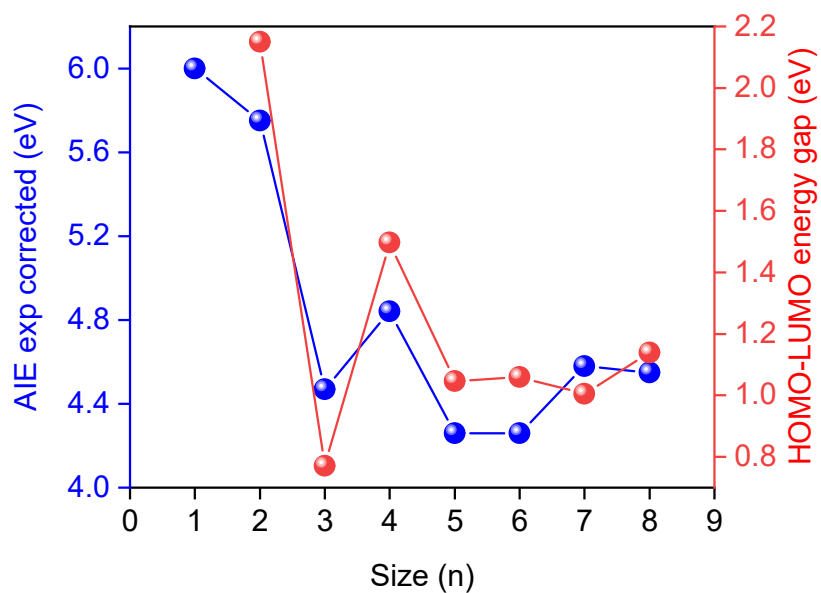

**Fig. S8.** Experimentally corrected AIEs along with the calculated HOMO– LUMO energy gaps are plotted as a function of cluster size, n.

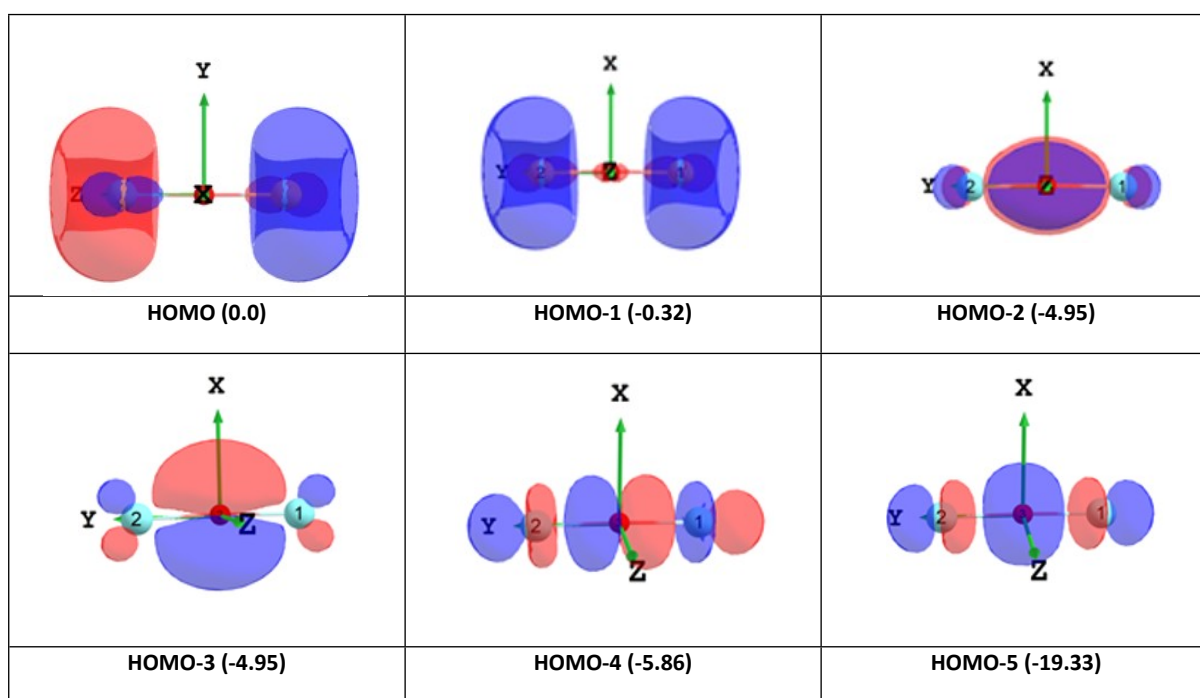

**Fig. S9.** Molecular orbitals (MOs) of  $Y_2O$ ; energies in eV with respect to the HOMO as 0.0 are provided in parenthesis.

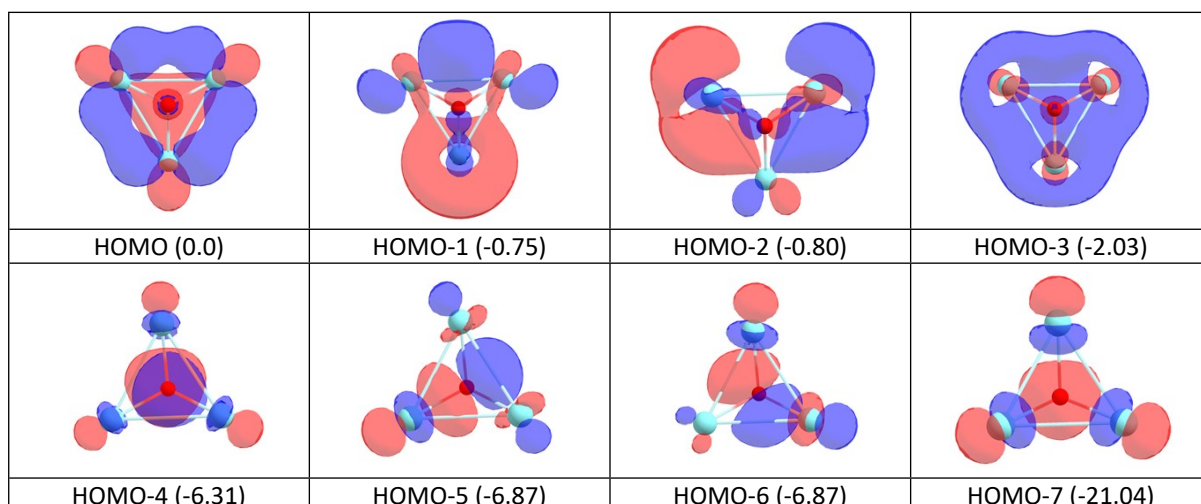

**Fig. S10.** Molecular orbitals (MOs) of  $Y_3O$ ; energies in eV with respect to the HOMO as 0.0 are provided in parenthesis.

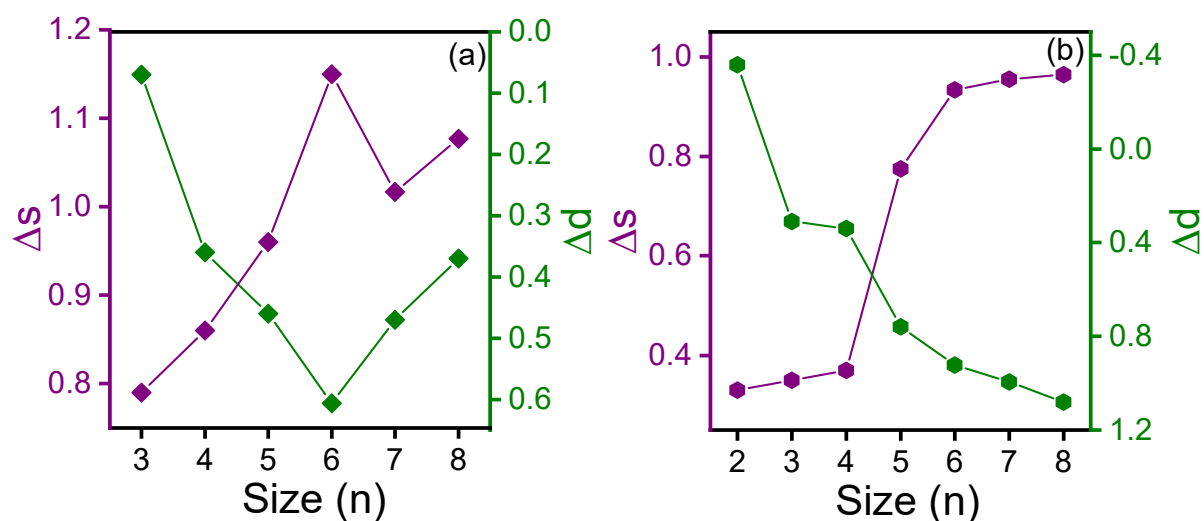

**Fig. S11.** (a) Average change in population of s and d atomic orbitals ( $\Delta s$  and  $\Delta d$ ) of yttrium atoms which are bonded with oxygen atom in  $Y_nO$  clusters. (b)  $\Delta s$  and  $\Delta d$  for yttrium atoms which are not bonded with oxygen.

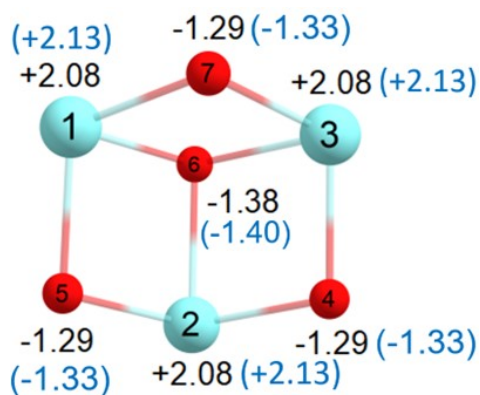

**Fig. S12.** Benchmarking of our NBO analysis. The charges reported by Misao et al. in *Phys. Chem. Chem. Phys.*, 2022, **24**, 11096–11103. The charges in parenthesis are our calculated values.

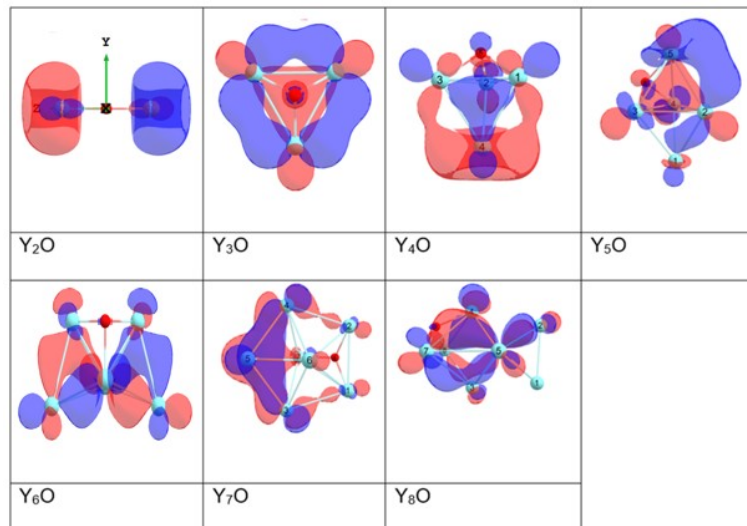

Fig. S13. HOMO orbitals of Y<sub>n</sub>O (n = 2 – 8) clusters.

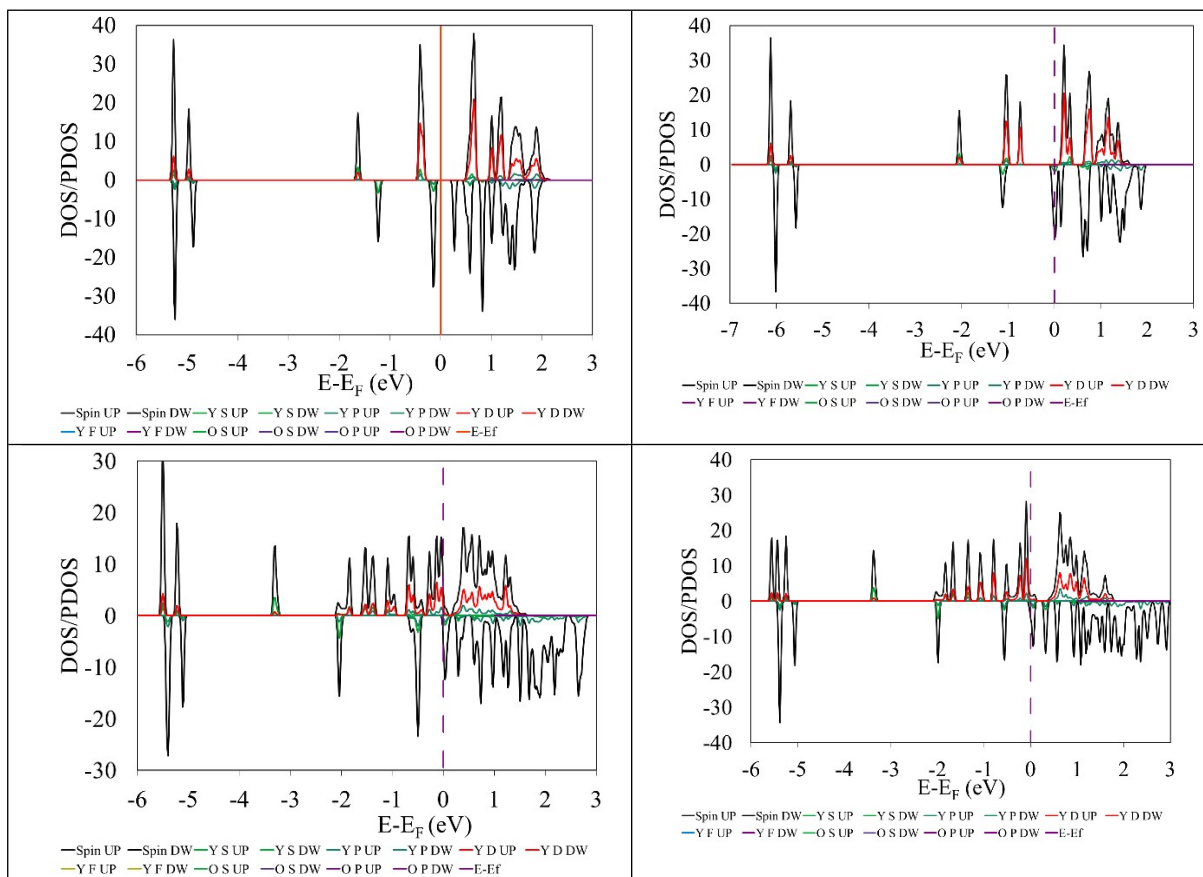

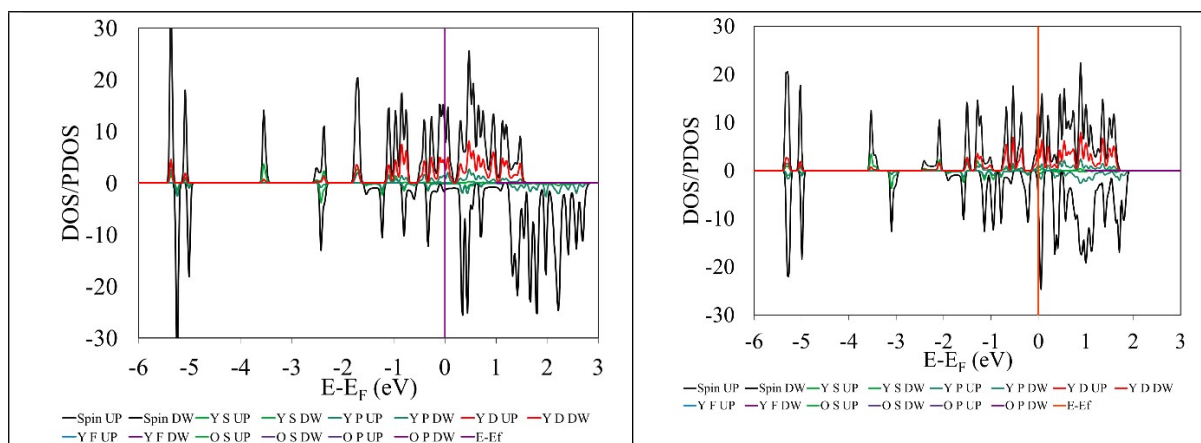

**Fig. S14.** The total density of states (DOS) and projected DOS of the ground state structures of  $Y_3O$ ,  $Y_5O$ , and  $Y_6O$  clusters presented from respectively top to bottom on the left column and the corresponding cations are provided on the right.  $E_F$  is Fermi energy in eV.

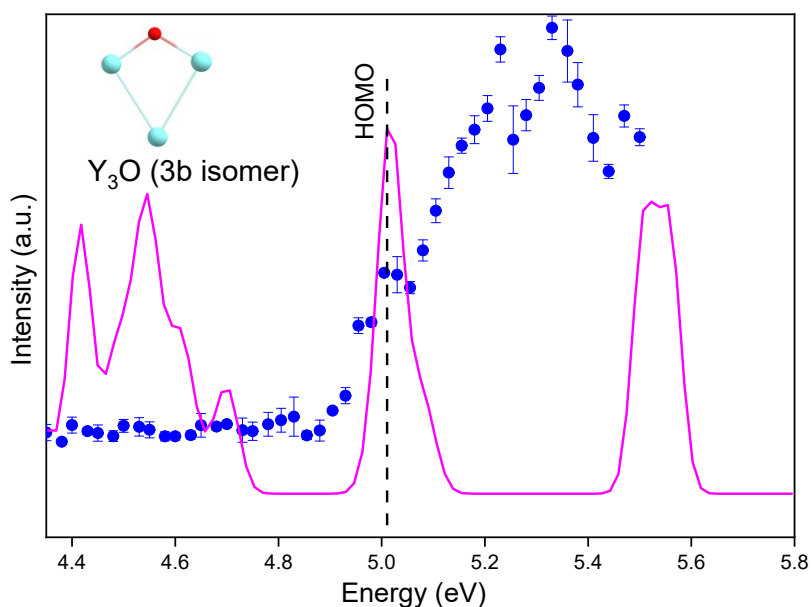

**Fig. S15.** Total density of states around the HOMO of the ground state isomers (magenta) of the neutral  $Y_3O$  (3b) cluster together with the experimental photoionization spectrum (blue spheres). The orbitals on the left of HOMO are unoccupied and higher in energy than HOMO and the orbitals on the right are occupied and lower in energy than HOMO. The first linear rise of ion intensity in the photoionization spectra is marked by a dotted line.
